# Supplementary material for: PAX7 is a required target for microRNA-206-induced differentiation of fusion-negative rhabdomyosarcoma
Source: PubMed Central journal article supplement (PMC5143388; doi:10.1038/cddis.2016.159), 2016-06-09

## **PAX7 is a required target for microRNA-206 induced differentiation of fusion-negative rhabdomyosarcoma**

Jason A. Hanna, Matthew R. Garcia, Jonathan C. Go, David Finkelstein, Kiran Kodali, Vishwajeeth Pagala, Xusheng Wang, Junmin Peng, and Mark E. Hatley

### **Supplementary Information Inventory**

#### **Supplementary Tables**

Supplementary Table S1. Gene ontology functional analysis.

Supplementary Table S2. RMS cell line STR authentication.

Supplementary Table S3. Antibodies used for immunoblot, immunocytochemistry, and immunohistochemistry analysis.

Supplementary Table S4. qRT-PCR primers and probes.

Supplementary Table S5. Primers and cloning sites for 3' UTR cloning of miR-206 and miR-206 targets.

Supplementary Table S6. Mutations of miR-206 target sites in target gene 3' UTR.

Supplementary Table S7. Cloning primers for site directed mutagenesis of miR-206 sites in 3' UTR of target genes.

Supplementary Table S8. Plasmids and PCR primers for subcloning cDNAs.

#### **Supplementary Figure Legends**

#### **Supplementary Figures**

Supplementary Figure S1. Increased miR-206 levels in RMS induces differentiation and decreases proliferation.

Supplementary Figure S2. miR-206 target identification.

Supplementary Figure S3. miR-206 target validation.

Supplementary Figure S4. Stable cDNA overexpression of targets.

Supplementary Figure S5. Target overexpression and analysis of miR-206 induced differentiation.

Supplementary Figure S6. Reduced exogenous PAX7 expression maintains high proliferation and reduced differentiation.

Supplementary Figure S7. PAX7 overexpression in FN-RMS and FP-RMS.

Supplementary Figure S8. siRNA knockdown of miR-206 targets.

Supplementary Figure S9. Deletion of miR-206 in FN-RMS mouse model.

## SUPPLEMENTARY TABLES

**Supplementary Table S1.** Gene ontology functional analysis.

| <b>Group of 23 down-regulated by mRNA, protein and predicted miR-206 targets</b> |                                                                                              |                |                |
|----------------------------------------------------------------------------------|----------------------------------------------------------------------------------------------|----------------|----------------|
| <b>Category</b>                                                                  | <b>GO term</b>                                                                               | <b># genes</b> | <b>P-value</b> |
| GOTERM_BP_FAT                                                                    | tissue regeneration                                                                          | 3              | 1.00E-03       |
| GOTERM_BP_FAT                                                                    | developmental growth                                                                         | 3              | 7.20E-03       |
| GOTERM_CC_FAT                                                                    | Golgi apparatus part                                                                         | 4              | 8.90E-03       |
| GOTERM_CC_FAT                                                                    | organelle envelope                                                                           | 5              | 1.20E-02       |
| GOTERM_CC_FAT                                                                    | cytoskeleton                                                                                 | 7              | 1.20E-02       |
| GOTERM_BP_FAT                                                                    | regulation of cellular protein metabolic process                                             | 4              | 3.10E-02       |
| GOTERM_BP_FAT                                                                    | wound healing                                                                                | 3              | 3.20E-02       |
| GOTERM_CC_FAT                                                                    | cortical actin cytoskeleton                                                                  | 2              | 4.10E-02       |
| <b>Group 39 down-regulated protein and predicted miR-206 targets</b>             |                                                                                              |                |                |
| <b>Category</b>                                                                  | <b>GO term</b>                                                                               | <b># genes</b> | <b>P-value</b> |
| GOTERM_MF_FAT                                                                    | Ras guanyl-nucleotide exchange factor activity                                               | 5              | 4.70E-05       |
| GOTERM_MF_FAT                                                                    | lipid binding                                                                                | 7              | 4.90E-04       |
| GOTERM_MF_FAT                                                                    | Rho guanyl-nucleotide exchange factor activity                                               | 4              | 6.50E-04       |
| GOTERM_MF_FAT                                                                    | phospholipid binding                                                                         | 5              | 6.90E-04       |
| GOTERM_BP_FAT                                                                    | positive regulation of apoptosis                                                             | 6              | 1.20E-03       |
| GOTERM_MF_FAT                                                                    | nucleoside-triphosphatase regulator activity                                                 | 6              | 2.30E-03       |
| GOTERM_CC_FAT                                                                    | membrane-bounded vesicle                                                                     | 6              | 3.60E-03       |
| GOTERM_BP_FAT                                                                    | positive regulation of transcription from RNA polymerase II promoter                         | 5              | 5.20E-03       |
| GOTERM_MF_FAT                                                                    | enzyme binding                                                                               | 6              | 6.40E-03       |
| GOTERM_BP_FAT                                                                    | RNA biosynthetic process                                                                     | 4              | 1.90E-02       |
| GOTERM_MF_FAT                                                                    | phosphoinositide binding                                                                     | 3              | 2.20E-02       |
| GOTERM_CC_FAT                                                                    | plasma membrane                                                                              | 13             | 2.80E-02       |
| GOTERM_BP_FAT                                                                    | intracellular signaling cascade                                                              | 7              | 2.90E-02       |
| GOTERM_MF_FAT                                                                    | metal ion binding                                                                            | 16             | 2.90E-02       |
| GOTERM_BP_FAT                                                                    | positive regulation of nucleobase, nucleoside, nucleotide and nucleic acid metabolic process | 5              | 3.00E-02       |
| GOTERM_BP_FAT                                                                    | positive regulation of nitrogen compound metabolic process                                   | 5              | 3.30E-02       |
| <b>Group 33 down-regulated by mRNA and predicted miR-206 targets</b>             |                                                                                              |                |                |
| <b>Category</b>                                                                  | <b>GO term</b>                                                                               | <b># genes</b> | <b>P-value</b> |
| SP_PIR_KEYWORD<br>S                                                              | carbohydrate metabolism                                                                      | 3              | 7.10E-03       |
| GOTERM_CC_FAT                                                                    | intrinsic to membrane                                                                        | 13             | 3.70E-02       |
| GOTERM_BP_FAT                                                                    | phosphate metabolic process                                                                  | 6              | 4.10E-02       |
| GOTERM_MF_FAT                                                                    | deaminase activity                                                                           | 2              | 4.50E-02       |
| <b>All down-regulated proteins by TMT proteomic profiling</b>                    |                                                                                              |                |                |
| <b>Category</b>                                                                  | <b>GO term</b>                                                                               | <b># genes</b> | <b>P-value</b> |
| GOTERM_BP_FAT                                                                    | cell cycle phase                                                                             | 27             | 8.90E-08       |
| GOTERM_BP_FAT                                                                    | organelle fission                                                                            | 17             | 7.80E-06       |
| GOTERM_CC_FAT                                                                    | proteinaceous extracellular matrix                                                           | 20             | 9.10E-06       |
| GOTERM_CC_FAT                                                                    | cytoskeleton                                                                                 | 49             | 1.50E-05       |
| GOTERM_BP_FAT                                                                    | cell division                                                                                | 18             | 5.00E-05       |
| GOTERM_BP_FAT                                                                    | regulation of small GTPase mediated signal transduction                                      | 16             | 9.60E-05       |
| GOTERM_BP_FAT                                                                    | regeneration                                                                                 | 8              | 3.30E-04       |
| GOTERM_BP_FAT                                                                    | double-strand break repair via homologous recombination                                      | 5              | 3.90E-04       |
| GOTERM_CC_FAT                                                                    | microtubule organizing center                                                                | 14             | 9.60E-04       |
| GOTERM_CC_FAT                                                                    | centrosome                                                                                   | 13             | 1.00E-03       |
| GOTERM_MF_FAT                                                                    | cytoskeletal protein binding                                                                 | 21             | 3.40E-03       |
| GOTERM_BP_FAT                                                                    | extracellular matrix organization                                                            | 8              | 3.70E-03       |
| GOTERM_CC_FAT                                                                    | cell junction                                                                                | 20             | 4.00E-03       |
| GOTERM_CC_FAT                                                                    | anchoring junction                                                                           | 10             | 5.10E-03       |
| GOTERM_BP_FAT                                                                    | glutamine metabolic process                                                                  | 4              | 5.20E-03       |
| GOTERM_BP_FAT                                                                    | apoptosis                                                                                    | 22             | 5.50E-03       |

|                                              |                                           |                |                |
|----------------------------------------------|-------------------------------------------|----------------|----------------|
| GOTERM_BP_FAT                                | regulation of cell development            | 11             | 5.90E-03       |
| GOTERM_BP_FAT                                | cell-matrix adhesion                      | 7              | 6.90E-03       |
| GOTERM_CC_FAT                                | cell-cell junction                        | 10             | 9.50E-03       |
| GOTERM_BP_FAT                                | cytokinesis during cell cycle             | 3              | 1.20E-02       |
| GOTERM_CC_FAT                                | tight junction                            | 6              | 1.20E-02       |
| GOTERM_BP_FAT                                | regulation of cell morphogenesis          | 8              | 1.30E-02       |
| GOTERM_BP_FAT                                | cell adhesion                             | 23             | 1.50E-02       |
| GOTERM_BP_FAT                                | nucleotide-excision repair                | 5              | 2.00E-02       |
| GOTERM_BP_FAT                                | developmental growth                      | 6              | 2.50E-02       |
| GOTERM_CC_FAT                                | actin cytoskeleton                        | 11             | 3.00E-02       |
|                                              |                                           |                |                |
| <b>All down-regulated mRNA by gene array</b> |                                           |                |                |
| <b>Category</b>                              | <b>GO term</b>                            | <b># genes</b> | <b>P-value</b> |
| GOTERM_BP_FAT                                | developmental growth                      | 7              | 1.50E-04       |
| GOTERM_CC_FAT                                | extracellular matrix                      | 12             | 2.70E-04       |
| GOTERM_BP_FAT                                | neural tube development                   | 6              | 4.10E-04       |
| GOTERM_CC_FAT                                | basement membrane                         | 6              | 6.80E-04       |
| GOTERM_BP_FAT                                | dorsal/ventral pattern formation          | 5              | 2.30E-03       |
| GOTERM_BP_FAT                                | glycoprotein metabolic process            | 8              | 2.70E-03       |
| GOTERM_BP_FAT                                | skeletal system development               | 10             | 2.80E-03       |
| GOTERM_BP_FAT                                | regulation of JUN kinase activity         | 4              | 4.80E-03       |
| GOTERM_BP_FAT                                | neuron fate commitment                    | 4              | 6.80E-03       |
| GOTERM_BP_FAT                                | proteoglycan metabolic process            | 4              | 7.30E-03       |
| GOTERM_BP_FAT                                | smoothened signaling pathway              | 3              | 1.30E-02       |
| GOTERM_BP_FAT                                | regulation of cellular response to stress | 5              | 1.50E-02       |
| GOTERM_BP_FAT                                | extracellular structure organization      | 6              | 1.80E-02       |
| GOTERM_CC_FAT                                | integral to plasma membrane               | 19             | 1.90E-02       |
| GOTERM_BP_FAT                                | embryonic digit morphogenesis             | 3              | 2.20E-02       |
| GOTERM_BP_FAT                                | cell differentiation in spinal cord       | 3              | 2.20E-02       |
| GOTERM_CC_FAT                                | intrinsic to plasma membrane              | 19             | 2.30E-02       |
| GOTERM_BP_FAT                                | tissue morphogenesis                      | 6              | 2.60E-02       |
| GOTERM_BP_FAT                                | blood vessel development                  | 7              | 2.60E-02       |
| GOTERM_CC_FAT                                | Golgi membrane                            | 6              | 2.60E-02       |
| GOTERM_BP_FAT                                | collagen fibril organization              | 3              | 2.90E-02       |
| GOTERM_BP_FAT                                | embryonic organ morphogenesis             | 5              | 3.50E-02       |
| GOTERM_BP_FAT                                | tissue regeneration                       | 3              | 3.50E-02       |
| GOTERM_BP_FAT                                | cell fate commitment                      | 5              | 4.00E-02       |
| GOTERM_BP_FAT                                | regulation of MAP kinase activity         | 5              | 4.20E-02       |

**Supplementary Table S2.** RMS cell line STR authentication.<sup>1</sup>

|            | Cell Line |          |            |          |        |
|------------|-----------|----------|------------|----------|--------|
|            | RD        | SMS-CTR  | Rh18       | Rh30     | Rh41   |
| D3S1358    | 15, 17    | 17       | 16         | 15       | 17     |
| TH01       | 9.3       | 6        | 7          | 9, 9.3   | 7, 9.3 |
| D2S11      | 28, 29    | 29, 31.2 | 32.2, 33.2 | 29, 31.2 | 29, 31 |
| D18S51     | 13, 18    | 13       | 16, 17     | 15, 16   | 15, 16 |
| Penta E    | 12        | 5, 17    | 8, 13      | 7, 17    | 11, 17 |
| D5S818     | 11        | 12       | 12         | 12, 13   | 10, 13 |
| D13S317    | 13        | 11       | 12         | 11       | 8, 9   |
| D7S820     | 8, 12     | 8, 11    | 8, 10      | 10       | 10, 11 |
| D16S539    | 10, 11    | 10, 11   | 9, 12      | 12       | 12, 13 |
| CSF1PO     | 10, 11    | 12       | 10         | 10, 11   | 11, 12 |
| Penta D    | 11, 13    | 11, 12   | 7, 12      | 11, 12   | 9, 12  |
| Amelogenin | X         | XY       | X          | XY       | X      |
| vWA        | 18        | 18, 19   | 15, 17     | 17, 18   | 16, 18 |
| D8S1179    | 11, 15    | 10, 12   | 13, 15     | 12, 15   | 10, 13 |
| TPOX       | 9         | 8, 12    | 8, 9       | 8, 11    | 8, 11  |
| FGA        | 20, 21    | 21, 22   | 23         | 22       | 20, 22 |

<sup>1</sup> STR profiles consistent with published profiles (Hinson A.R. et al., *Frontiers in Oncology*, 2013, 3:183).

**Supplementary Table S3.** Antibodies used for immunoblot, immunocytochemistry, and immunohistochemistry analysis.

| Immunoblot antibodies           |                                             |             |          |           |
|---------------------------------|---------------------------------------------|-------------|----------|-----------|
| Antibody                        | Supplier                                    | Product No. | Dilution | Diluent   |
| CCND2                           | Cell Signaling Technology                   | 3741        | 1:1000   | 5% BSA    |
| EML4                            | Cell Signaling Technology                   | 12156       | 1:1000   | 5% BSA    |
| GAPDH                           | EMD Millipore                               | MAB374      | 1:10000  | 5% Milk   |
| GJA1                            | Cell Signaling Technology                   | 3152        | 1:1000   | 5% BSA    |
| KIF2A                           | Sigma                                       | HPA004716   | 1:1000   | 5% Milk   |
| NOTCH3                          | Cell Signaling Technology                   | 5276        | 1:1000   | 5% Milk   |
| PAX3                            | Developmental Studies Hybridoma Bank (DSHB) | Supernatant | 1:500    | 5% Milk   |
| PAX7                            | DSHB                                        | Supernatant | 1:500    | 5% Milk   |
| PAX7                            | Sigma                                       | AV32742     | 1:4000   | 5% Milk   |
| TWF1                            | Cell Signaling Technology                   | 8461        | 1:1000   | 5% BSA    |
|                                 |                                             |             |          |           |
| Immunocytochemistry antibodies  |                                             |             |          |           |
| Antibody                        | Supplier                                    | Product No. | Dilution |           |
| MF-20                           | DSHB                                        | Supernatant | 1:25     |           |
| Ki67                            | Thermo Scientific                           | RM-9106     | 1:100    |           |
| Alexa 488 goat anti-mouse       | Invitrogen                                  | A-11029     | 1:500    |           |
| Alexa 568 goat anti-rabbit      | Invitrogen                                  | A-11036     | 1:500    |           |
|                                 |                                             |             |          |           |
| Immunohistochemistry antibodies |                                             |             |          |           |
| Antibody                        | Supplier                                    | Product No. | Dilution | Retrieval |
| Desmin                          | ThermoFisher                                | RB-9014     | 1:500    | HIER      |
| MyoD1                           | Cell Marque                                 | 386R-18     | Neat     | HIER      |
| Myogenin                        | Dako                                        | M3559       | 1:200    | HIER      |
| PAX7                            | DSHB                                        | Supernatant | 1:10     | HIER      |

**Supplementary Table S4. qRT-PCR primers and probes.**

| <b>SYBR Primers</b> |                |                          |                       |
|---------------------|----------------|--------------------------|-----------------------|
| <b>Gene</b>         | <b>Species</b> | <b>Primer 1</b>          | <b>Primer 2</b>       |
| <i>ACTA1</i>        | Human          | CTTCGTCGCACATTGTGTCT     | GACAGCGCCAAGTGAAGC    |
| <i>AP1S1</i>        | Human          | TATGCCAAACCCATCTCCTC     | CCAGGACACCTCCAAGAAGA  |
| <i>ATP6V1A</i>      | Human          | GCACATAACCAAATGTGCTTTC   | TCGGTACAGTCTCTGCACCTC |
| <i>CAP1</i>         | Human          | CGGTGCATGTCAGAGGTATG     | GGAGGTGAGGCGGAACCTC   |
| <i>CCND2</i>        | Human          | ACGGTACTGCTGCAGGCTAT     | AGCTGCTGGCTAAGATCACC  |
| <i>CKM</i>          | Human          | CTCCTTCTCCGTATGCTCT      | GGTGGAGAAGCTCTCTGTGG  |
| <i>EML4</i>         | Human          | TGACTCAAGAGCTGACAGGC     | CGCAAGATGGACGGTTTC    |
| <i>EZH1</i>         | Human          | ACTATGTGGTGCCTTCTCCG     | CATGTGGCACAGACTGCTTC  |
| <i>FAM101B</i>      | Human          | GCTGGACAGAAACCTCCTCA     | GTACCACCATCGTGTACCCC  |
| <i>FAM91A1</i>      | Human          | CAGGGTCCAAACCAAGAAGG     | TCTAGTTGCGCAAACCTGCAC |
| <i>G6PD</i>         | Human          | CACCAGATGGTGGGGTAGAT     | AGAGCTTTTCCAGGGCGAT   |
| <i>GJA1</i>         | Human          | GAGTTTGCCTAAGGCGCTC      | AGGAGTTCAATCACTTGGCG  |
| <i>GJA1(1)</i>      | Human          | GAGCGCCTTAGGCAAACCTC     | ACACCTTCCCTCCAGCAGTT  |
| <i>GPD2</i>         | Human          | GTCCCTTTCACCTGCCTTTTG    | GAGGAACTGGGTGCTCCTG   |
| <i>HDAC4</i>        | Human          | CTGGTCTCGGCCAGAAAGT      | CGTGGAATTTTGTAGCCATT  |
| <i>IGFBP5</i>       | Human          | GAGTAGTCTCCTCGGCCAT      | GGTTTGCCTCAACGAAAAGA  |
| <i>KIF2A</i>        | Human          | ATTGGACGAACATCACCAGC     | AGGAATGGCATCCTGTGAAA  |
| <i>LASP1</i>        | Human          | CATGCGGCTCTTCTCAAACCT    | AGGTTTACAGCGTAGTGGCAG |
| <i>MAN1C1</i>       | Human          | ACCCTCGTAGCCATCTTTTG     | AGCGGGAGAAAATCAAGGAG  |
| <i>MYH1</i>         | Human          | GCACACCAGAACACCAG        | GCTTCTTCCCACCCTTCAG   |
| <i>NOTCH3</i>       | Human          | CCTGAGTGACAGGGGTCCT      | TGTGCAAATGGAGGTCGTT   |
| <i>PAX3</i>         | Human          | CTTCATCTGATTGGGGTGCT     | GACTTGGAGAGGAAGGAGGC  |
| <i>PAX7</i>         | Human          | CTTCAGTGGGAGGTCAGGTT     | CAAACACAGCATCGACGG    |
| <i>PDCD4</i>        | Human          | TTCATCACCGGAAAAGAGAGA    | GTGCAAGCGAAATTAAGGGA  |
| <i>PNP</i>          | Human          | CAACTTGAGGTCGGTGCTTAG    | GTCTGCGAGACCATGGAGA   |
| <i>SLC25A1</i>      | Human          | ACAATCTCCCTAACCCCGTG     | CCCCATGGAGACCATCAA    |
| <i>SULF1</i>        | Human          | ATCCTGGTTGAATAATCAATCTCT | ATGCAGGTTCTTCAAGGCAG  |
| <i>TAGLN2</i>       | Human          | CATATGCAGGTCCTGTTG       | CCCTTGCCTTGAGTCAGTG   |
| <i>TIMP3</i>        | Human          | ATGGTGTAGACCACGCTGC      | AGGACGCCTTCTGCAACTC   |
| <i>TWF1</i>         | Human          | ATCCCAGGAATCTGAAGGCT     | TCTTTGCCAGAGCCAGAAAT  |
| <i>XPO6</i>         | Human          | CAGGGCATCTTCGTACCTGT     | ATCTGGACGCTGTTTTTGA   |
| <hr/>               |                |                          |                       |
| <i>Ccnd2</i>        | Mouse          | CAGAGCTTCGATTTGCTCCT     | ACACACTCACGTGTGATGCC  |
| <i>Ckm</i>          | Mouse          | CAGCTTGAACCTGTTGTGGG     | ACCTCCACAGCACAGACAGA  |
| <i>Myf5</i>         | Mouse          | GACAGGGCTGTTACATTGAGG    | TGAGGGAACAGGTGGAGAAC  |
| <i>Myh2</i>         | Mouse          | TGCGGAACTTGGATAGATTTG    | TTGGTGGATAAACTCCAGGC  |
| <i>Myh4</i>         | Mouse          | ACTTGCCAGGTTGACATTG      | GCAGGACTTGGTGGACAAAC  |
| <i>MyoD1</i>        | Mouse          | GTCGTAGCCATTCTGCCG       | AGCACTACAGTGGCGACTCA  |
| <i>Myogenin</i>     | Mouse          | GTGGGAGTTGCATTCACTGG     | CTACAGGCCTTGCTCAGCTC  |
| <i>Notch3</i>       | Mouse          | GAATCTGGAAGACACCCTGG     | AAGCGTCTCCTGGATGCTG   |
| <i>Pax3</i>         | Mouse          | CGGAGCCTTCATCTGACTG      | GGGGATCTAGAAAGGAAGG   |
| <i>Pax7</i>         | Mouse          | GTCGGGTTCTGATTCCACAT     | GCGAGAAGAAAGCCAAACAC  |
| <hr/>               |                |                          |                       |
| <b>Taqman Probe</b> | <b>Species</b> | <b>Assay ID</b>          |                       |
| <i>U6 snRNA</i>     | Human/mouse    | 4427975-001973           |                       |
| <i>miR-206</i>      | Human/mouse    | 4427975-000510           |                       |
| <i>18S</i>          | Human          | 4308329                  |                       |
| <i>NOTCH3</i>       | Human          | Hs01128541_m1            |                       |
| <i>Myh1</i>         | Mouse          | Mm01332489_m1            |                       |

**Supplementary Table S5.** Primers and cloning sites for 3' UTR cloning of miR-206 and miR-206 targets.

| Gene    | 3' UTR Region | Fwd Primer                         | Rev Primer                           | Sites |
|---------|---------------|------------------------------------|--------------------------------------|-------|
| miR-206 |               | ccccGAATTCggcaaggaggaaagatgcta     | ccccGTTCGACctggggccagcaggaggcc       |       |
| CCND2   | Stop-1324     | gagactcgagggatgccagttgggcccga      | ataagcgccgccacaccctgatgttcagccatc    | 3     |
| EGFR    | Stop-1649     | gagactcgagccacggagatagatgagc       | ataagcgccgcgctctgactgatctgggag       | 1     |
| EML4    | 51-2272       | gagactcgagtaagttcaggtaacaggatgggc  | ataagcgccgcgcatgatagcaatggctcaacatc  | 1     |
| EZH1    | 16-2218       | aagctcgagcggcagcacttatgttag        | ataagcgccgcctaagagggtcacaagccac      | 0     |
| G6PD**  | 55-445        |                                    |                                      | 3     |
| GJA1    | 91-1698       | gagactcgagtgagggtgactcaacagc       | ataagcgccgcaagaacactctccagaacacatga  | 2     |
| HDAC4   | 2023-3693     | gagactcgagctctgaccacatcgtcaggatag  | ataagcgccgcgctcatgccggtctacagtc      | 3     |
| HEYL    | Stop-2946     | gagactcgagatggtccagcagctgtcc       | ataagcgccgcggcacagtcaccaacaagtaa     | 2     |
| IGFBP5  | 460-2920      | gagagttaaaccaggatgtggcaatcaatgac   | ataagcgccgctgggaggcttagtccatgt       | 1     |
| KIF2A   | Stop-1455     | gagactcgagaccggcatttctgctaaag      | ataagcgccgccatagctccccttggctcc       | 2     |
| MAN1C1  | 77-977        | gagactcgaggtgggaacgaaggcccat       | ataagcgccgccactcaactgggtggcca        | 2     |
| NOTCH3  | Stop-1014     | gagactcgaggagctgtcagttcttagatct    | ataagcgccgcccttattaggtggtgagggg      | 1     |
| PAX3    | Stop-1407     | gagactcgaggtgaactgtccacttgagct     | ataagcgccgcacttcttcttccatcacccctc    | 2     |
| PAX7    | 1499-3097     | gagactcgagcctcaattcctcctccctggga   | ataagcgccgcgcatagcttggttcttacacatcac | 5     |
| PDCD4   | 1932          | gagactcgagatataagaactcttcagctttaga | ataagcgccgctacagaggatcttacctgttatt   | 2     |
| PIK3C2A | Stop-3139     | gagactcgagactagtaattgagcttggga     | ataagcgccgccaatcgtatgacagttatgaagtc  | 2     |
| RAPGEF2 | Stop-1988     | gagactcgagggcacagactttctggaag      | ataagcgccgccagctgttacaactggatg       | 1     |
| SULF1   | Stop-2203     | gagactcgagtcagccccgtcactgca        | ataagcgccgcctgtcatcccaccgatgatacac   | 2     |
| TIMP3   | 44-1964       | gagactcgaggttcccttgacactaact       | ataagcgccgcaatggcatgaccacaatggg      | 2     |
| TWF1    | Stop-1812     | gagactcgaggtcatcacattaactgttaactag | ataagcgccgccaccagaaggcatgtaattc      | 2     |

\*miR-206 sites predicted from TargetScan

\*\*G6PD 3'UTR subcloned from Addgene pAG69-G6PD-3'UTR.

**Supplementary Table S6.** Mutations of miR-206 target sites in target gene 3' UTR.

| Gene          | Location  | Conserved | Original Site*                  | Mutated Site**                  |
|---------------|-----------|-----------|---------------------------------|---------------------------------|
| CCND2 Site A  | 953-959   | Yes       | AGCAUUGUUUAAACCAU <u>UCCA</u>   | AGCAUUGUUUAAACCAU <u>GAAU</u>   |
| CCND2 Site B  | 1163-1169 | Not mouse | CACCCUUCUGUGCUGACAU <u>UCCC</u> | CACCCUUCUGUGCUGACAU <u>GAAC</u> |
| CCND2 Site C  | 1177-1183 | Not mouse | GACAUUCCCAUCACAACAU <u>UCCU</u> | GACAUUCCCAUCACAACAU <u>GAAU</u> |
| EML4 Site A   | 1439-1445 | Yes       | UUUACGUGAUUUGCCAU <u>UCAA</u>   | UUUACGUGAUUUGCCAU <u>GAAA</u>   |
| GJA1 Site A   | 478-485   | Yes       | UAAGUCCUGCUAAAACAU <u>UCCA</u>  | UAAGUCCUGCUAAAACAU <u>GAAA</u>  |
| GJA1 Site B   | 1609-1616 | Yes       | UUACUAAUUUGUUUGACAU <u>UCCA</u> | UUACUAAUUUGUUUGACAU <u>GAAA</u> |
| KIF2A Site A  | 528-534   | Yes       | CAGCCAAGAAAAUUACAU <u>UCCU</u>  | CAGCCAAGAAAAUUACAU <u>GAAU</u>  |
| KIF2A Site B  | 673-679   | Yes       | AUAUAGCUGCUGGACCAU <u>UCCA</u>  | AUAUAGCUGCUGGACCAU <u>GAAU</u>  |
| MAN1C1 Site A | 211-217   | Not mouse | GCCACACUGGCCACACAU <u>UCCU</u>  | GCCACACUGGCCACACAU <u>GAAU</u>  |
| MAN1C1 Site B | 255-261   | Not mouse | AGCCACUCACUUGCCAU <u>UCCAG</u>  | AGCCACUCACUUGCCAU <u>GAAAG</u>  |
| NOTCH3 Site A | 658-664   | Yes       | UCCUCACUUCACUGCAU <u>UCCAG</u>  | UCCUCACUUCACUGCAU <u>GAAAG</u>  |
| PAX3 Site A   | 841-848   | Yes       | CAUCGAGGAGCUAGAACA <u>UCCA</u>  | CAUCGAGGAGCUAGAACA <u>CATA</u>  |
| PAX3 Site B   | 1816-1822 | Yes       | GAGGUAGGCACAAUACA <u>UCCU</u>   | GAGGUAGGCACAAUACA <u>CCTCU</u>  |
| PAX7 Site A   | 1588-1595 | Not mouse | CUGUCACUGUAAUCUACA <u>UCCA</u>  | CUGUCACUGUAAUCUACA <u>ATGA</u>  |
| PAX7 Site B   | 1747-1753 | Yes       | CCUCAGUCAACAAGACA <u>UCCU</u>   | CCUCAGUCAACAAGACA <u>GAAU</u>   |
| PAX7 Site C   | 2179-2185 | Yes       | AAACACUCGUCAUCCACA <u>UCCU</u>  | AAACACUCGUCAUCCACA <u>GAAU</u>  |
| PAX7 Site D   | 2318-2325 | Yes       | CAUCCCCAGGAGGCGACA <u>UCCA</u>  | CAUCCCCAGGAGGCGACA <u>ATGA</u>  |
| PAX7 Site E   | 2984-2990 | Not mouse | GUGUUUCAAAUUAUGCAU <u>UCCAG</u> | GUGUUUCAAAUUAUGCAU <u>GAAAG</u> |
| SULF1 Site A  | 390-397   | Yes       | UUGAAUGGAAUAAACGACA <u>UCCA</u> | UUGAAUGGAAUAAACGACA <u>GAAA</u> |
| SULF1 Site B  | 871-878   | Not mouse | UAAUCACAGCCACCAACA <u>UCCA</u>  | UAAUCACAGCCACCAACA <u>GAAA</u>  |
| TWF1 Site A   | 70-76     | Yes       | CAGGAGAACUGAAAUACA <u>UCCA</u>  | CAGGAGAACUGAAAUACA <u>GAAA</u>  |
| TWF1 Site B   | 1613-1620 | Yes       | CAUUAAGUAAUUGGACA <u>UCCA</u>   | CAUUAAGUAAUUGGACA <u>GAAA</u>   |

\*miR-206 recognition site underlined

\*\*nucleotides mutated highlighted in red.

**Supplementary Table S7.** Cloning primers for site directed mutagenesis of miR-206

sites in 3' UTR of target genes.

| Gene                          | Primer Sequence                                                      |
|-------------------------------|----------------------------------------------------------------------|
| <i>EML4</i> Site A Primer 1   | gaatgacagttctgatgcacttttcatggcacaatcacgtaaacgcct                     |
| <i>EML4</i> Site A Primer 2   | aggcgtttacgtgattgccaatgaaaagtgcatcagaactgtcattc                      |
| <i>GJA1</i> Site A Primer 1   | cttaccctcaaagtgcaaatttaacaattcatgttttagcagggacttaaggacaatc           |
| <i>GJA1</i> Site A Primer 2   | gattgtccttaagtccctgctaaaacatgaaattgttaaaattgcacttgaaggtaag           |
| <i>GJA1</i> Site B Primer 1   | tgaacatgaccgtagttaacatttcatgtcaaacaaattagtaatttcatgtacaaaactgtttatg  |
| <i>GJA1</i> Site B Primer 2   | cataaacagttttgtacaatgaaaactactaattgtttgacatgaaatgtaaacacggctcatgttca |
| <i>KIF2A</i> Site A Primer 1  | ggtaattacaatgacaattcatgtaattttctggctgtgcttcagaaaattagggctc           |
| <i>KIF2A</i> Site A Primer 2  | gaccctaaatttctgaagcacagccaagaaaattacatgaattgtcattgtaaaattacc         |
| <i>KIF2A</i> Site B Primer 1  | aattccagatttcttacatataagatttcatggctccagcagctataccactgtc              |
| <i>KIF2A</i> Site B Primer 2  | gacagtggatagctgctggaccatgaaatcttatatgtaaaagaaatctggaatt              |
| <i>MAN1C1</i> Site A Primer 1 | cttcatagaaattctctgtagaaattcatgtgtggccagtggtggccatg                   |
| <i>MAN1C1</i> Site A Primer 2 | catggccacactggcccacacatgaatttctacagagaatttctatgaag                   |
| <i>MAN1C1</i> Site B Primer 1 | ggtcctttggcccttcatggcaagtgaagtggtggcctcatagaaa                       |
| <i>MAN1C1</i> Site B Primer 2 | tttctatgaagcccactcactgccaatgaaagggccaaaggacc                         |
| <i>NOTCH3</i> Site A Primer 1 | acatgtcccacttttcatgcatggaagtgaggagggtgggt                            |
| <i>NOTCH3</i> Site A Primer 2 | acccacctccctcacttcaactgcatgaaagatgggacatgtt                          |
| <i>PAX3</i> Site A Primer 1   | atcatcgaggagctagaacatcatatttgcctgtgctgcgtgcgtg                       |
| <i>PAX3</i> Site A Primer 2   | cacgcacgcacacaagcaaatatgatgttctagctcctcctgatgat                      |
| <i>PAX3</i> Site B Primer 1   | tacgtcatagttcctaactctaaaagagggtgattttgtgctacctcattcgtgg              |
| <i>PAX3</i> Site B Primer 2   | ccacgaatgaggtaggcacaaatacacctcttttagagtaagaactatgacgta               |
| <i>SULF1</i> Site A Primer 1  | gtgttcagaattcaaatgattaacttcttcatgctggttaccattcaagtttactctctg         |
| <i>SULF1</i> Site A Primer 2  | cagagagtaaaacttgaatggaataacgacatgaaagaagttaactcattgaaattctgaacac     |
| <i>SULF1</i> Site B Primer 1  | gtaccagggtagcttttcatgttgggtgctgattacccttattagt                       |
| <i>SULF1</i> Site B Primer 2  | actaataaaggtaatacagccaccaacatgaaagctaccctgggtac                      |
| <i>TWF1</i> Site A Primer 1   | caattttttccctactttatatacaacttcatgattcagttctcctgactaaaagctggac        |
| <i>TWF1</i> Site A Primer 2   | gtccagcttttagtacagggagaaactgaaatcatgaaatgttgataaaagtagggaaaaaaattg   |
| <i>TWF1</i> Site B Primer 1   | agtttaagactataatcacatctatatttctcatgcccattacttaagtgtgtagtggaaattag    |
| <i>TWF1</i> Site B Primer 2   | ctaaattccactacactacataaagtaaatggacatgaaagaatatagatgtgattatagcttaaac  |

**Supplementary Table S8.** Plasmids and PCR primers for subcloning cDNAs.

| Addgene Plasmids         |                   |                                      |                                         |
|--------------------------|-------------------|--------------------------------------|-----------------------------------------|
| Gene                     | Catalog Number    | Fwd Primer                           | Rev Primer                              |
| G6PD                     | 41521             | gatcctcgaactagtcctatggcagagcaggtgg   | ctcaagctcgaattctcagagcttgggggttc        |
| GJA1                     | 27383             | gatcctcgaactagtagtgggtgactggagcgccct | ctcaagctcgaattctcagatctccagggtcatcaggcc |
| IGFBP5                   | 11608             | gatcctcgaactagtcaccatgggtgtgctcacc   | ctcaagctcgaattctcactcaacgttgcgtgctgctg  |
| KIF2A                    | 52401             | atatcccgggatggcaacggccaactcgg        | ataagaattctaaagggcacggggtcctt           |
| NOTCH3-NICD              | 40640             | ataaactagtagtgggtggccggcgcaagcgcg    | ataagaattctcaggccaacacttgcctctggg       |
| SULF1                    | 13003             | atatcccgggatggcaacggccaactcgg        | atatcccgggtaaccttccatccatccc            |
| Open Biosystems Plasmids |                   |                                      |                                         |
| CCND2                    | MHS6278-202760158 | gagaactagtgagagcgagaccagtttaa        | ataagaattcgagaccagattatggacgcg          |
| EML4                     | MHS6278-213244183 | gatcctcgaactagtagacggcgacactagag     | ctcaagctcgaattctcagcactgaagccagggtgt    |
| HDAC4*                   | MHS6278-202759515 |                                      |                                         |
| PAX3                     | MHS6278-211689916 | gagaactagtagtgcgtggaacatttgccc       | ataagaattcggaagaccagaaacagggc           |
| PAX7                     | MHS6278-211690930 | gagaactagtagagatcgagcagggg           | ataagaattcctagtagcgaagcagaggct          |
| TWF1                     | MHS6278-202808952 | gagaactagtggtcgcgggcgatgacg          | atatcccgggtaactcagtagtagcttccgttccgc    |

\*HDAC4 was blunt cloned using XmaI site.

## Supplementary Figure Legends

### Supplementary Figure S1. Increased miR-206 levels in RMS induces differentiation and decreases proliferation.

(a) miR-206 expression in human RMS cell lines and LHCN-M2 immortalized myoblasts and differentiated myotubes. Expression of terminal differentiation genes in human RMS cells 5 days after transfection with NC or miR-206 mimic by qRT-PCR for (b) *MYH1*,  $p < 0.05$  for all excluding Rh18  $p = 0.20$ . (c) *ACTA1*  $p < 0.05$  for all excluding Rh18  $p = 0.20$ , and (d) *CKM*,  $p < 0.05$  for all excluding Rh18  $p = 0.0664$ .

### Supplementary Figure S2. miR-206 target identification.

(a) Heat map comparing differential expression of mRNAs in RD cells transfected with NC and miR-206 mimic. Down-regulated genes indicated in green (-1.5 SD) and up-regulated genes indicated in red (1.5 SD) with  $FDR < 0.05$ . (b) Volcano plot of the  $\text{Log}_{10}$  of the p value versus the log ratio fold difference in mRNA expression in RD cells transfected with NC or miR-206 mimic. (c) Venn diagram of mRNAs and proteins up-regulated upon miR-206 mimic transfection and predicted targets by the TargetScan algorithm and proteins (d) TMT proteomic analysis 24 hours after NC or miR-206 mimic transfection with fold change and (e) 30 most down- and 20 most up-regulated proteins with p-value  $< 0.05$  and fold change  $> 1.3$ . (f) Venn diagram of predicted targets by TargetScan and 24 hour proteomic analysis. (g) Gene expression in 77 human FN-RMS tumors compared to 37 normal skeletal muscles of 32 overlapping genes from (f). (h) Gene expression in 94 human FP-RMS tumors compared to normal skeletal muscle of 23 overlapping genes from Figure 1e.



**Supplementary Figure S3. miR-206 target validation.** Luciferase activity in 293T cells co-transfected with wild type 3' UTRs of indicated genes and (a) 100 ng of miR-206 or control vector or (b) increasing amounts (25, 50 and 100 ng) of miR-206 vector. Student's unpaired t-test  $p < 0.0001$  for all excluding EZH1 and empty vector. Luciferase activity represented as mean  $\pm$  SEM ( $n = 4$ ), Renilla/Firefly luciferase ratio normalized to empty reporter (no miR-206). (c) Schematic of predicted miR-206 target sites. (d) qRT-PCR expression for CCND2, (e) NOTCH3, (f) PAX3, or (g) PAX7 in human RMS cells lines 5 days after transfection with NC or miR-206 mimic. Student's unpaired t-test  $p < 0.05$  for all comparisons of NC to miR-206 mimic excluding Rh18 cells *CCND2* ( $p = 0.197$ ), *NOTCH3* ( $p = 0.0597$ ), and *PAX3* ( $p = 0.405$ ).

**Supplementary Figure S4. Stable cDNA overexpression of targets.** (a) qRT-PCR validation of cDNA overexpression in RD cells stably transduced with indicated cDNA or control empty control vector 5 days after transfection with NC or miR-206 mimic. (b) Immunoblots for cDNA overexpression in RD cells as in (a).

**Supplementary Figure S5. Target overexpression and analysis of miR-206 induced differentiation.** (a) ICC for MHC (green), Ki67 (red), and DAPI (blue) in RD cells stably transduced with indicated cDNA 5 days after transfection with NC or miR-206 mimic. (b) Quantification of percentage of MHC expressing cells from (a),  $p < 0.01$  for all NC compared to miR-206 mimic transfected and no significant difference between empty vector and cDNA transduced cells with miR-206. (c) Quantification of Ki67 positive cells from (a).  $p < 0.05$  for CCND2, G6PD, NOTCH3, and PAX3 transfected with miR-206 mimic compared to empty vector with miR-206 mimic. (d) qRT-PCR for *CKM* in cells as

described in (a),  $p < 0.05$  for CCND2, G6PD, NOTCH3, and PAX3 transfected with miR-206 mimic compared to empty vector cells with miR-206 mimic.

**Supplementary Figure S6. Reduced exogenous PAX7 expression maintains high proliferation and reduced differentiation.** (a) Immunoblot of stably transduced RD cells with empty or increasing viral titer of pSin-PAX7-Blast. (b) qRT-PCR and (c) immunoblot of PAX7 in stably transduced RD cells with empty or lowest titer of virus (40-fold reduction from Figure 4) 5 days after NC or miR-206 mimic transfection. (d) ICC for MHC (green), Ki67 (red), and DAPI (blue) in cells from (c). (e) Quantification of percentage of MHC expressing cells from (d),  $p < 0.0001$  for miR-206 mimic transfected empty cells compared to PAX7 cells. (f) Quantitation of percentage of Ki67 expressing cells from (d),  $p < 0.05$  comparing miR-206 mimic transfected empty cells to PAX7 cells. (g) Expression of *CKM* by qRT-PCR in cells from (c),  $p < 0.05$  comparing miR-206 mimic transfected empty cells to PAX7 cells.

**Supplementary Figure S7. PAX7 overexpression in FN-RMS and FP-RMS.** (a) *PAX7* expression by qRT-PCR in RMS cell lines and normal myoblasts and differentiated myotubes, expression normalized to myoblasts. (b) *PAX7* expression by qRT-PCR in SMS-CTR, Rh41, and Rh30 cells transduced with empty or PAX7 cDNA 5 days after transfection with NC or miR-206 mimic.  $p < 0.05$  for all Empty NC compared to PAX7 NC,  $p < 0.05$  for all Empty NC compared to Empty 206 Mimic, and no significant difference was observed between PAX7 NC and PAX7 206 mimic transduced cells except in SMS-CTR,  $p = 0.0118$ . (c) qRT-PCR expression of *CKM* in cells treated as in (b). For cells transduced with empty control  $p < 0.05$  for all Empty NC compared to

Empty 206 mimic. For cells transduced with PAX7,  $p < 0.05$  for Rh30 and Rh41 Empty NC compared to PAX7 206 mimic, but  $p = 0.482$  for SMS-CTR.

**Supplementary Figure S8. siRNA knockdown of miR-206 targets.** (a) Immunoblot and (b) qRT-PCR of RD cells 3 days after transfection with indicated siRNAs to CCND2, NOTCH3, PAX3, and PAX7. Student's unpaired t-test  $p < 0.05$  for all siRNAs compared to NC. (c) ICC for MHC (green), Ki67 (red) and DAPI (blue) of cells transfected with indicated individual siRNAs or a pool of all of the B siRNAs 5 days after transfection. (d) Quantitation of ICC for percentage of MHC positive nuclei in cells from (c),  $p < 0.05$  for miR-206 mimic, PAX3-B, and PAX7-B compared to NC (e) Quantitation for percentage of Ki67 positive nuclei of (c) as well as ICC from Figure 5c,  $p < 0.05$  for all excluding CCND2-B ( $p = 0.074$ ), PAX3-B ( $p = 0.31$ ), and PAX7-A ( $p = 0.075$ ) in comparing the siRNAs to the NC siRNA.

**Supplementary Figure S9. Deletion of miR-206 in FN-RMS mouse model.** (a) Schematic of mouse cross breeding to generate *aP2-Cre* tumor mice. (b) qRT-PCR in WT and KO tumors for embryonic muscle development genes and terminally differentiated skeletal muscle genes ( $n = 3$ ). No significant differences observed between miR-206 WT and KO tumors. (c) Quantification of percentage of MyoD1 positive cells and (d) Myogenin positive cells in WT and KO tumors ( $n = 2$ ). Percentage calculated as ratio of positively stained nuclei: total nuclei in 4 random fields from IHC presented in Figure 6D ( $p = 0.752$  for MyoD1 and  $p = 0.733$  for Myogenin).

**a**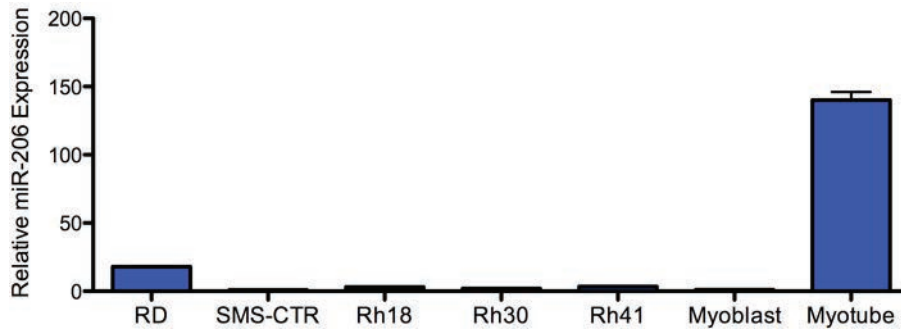**b**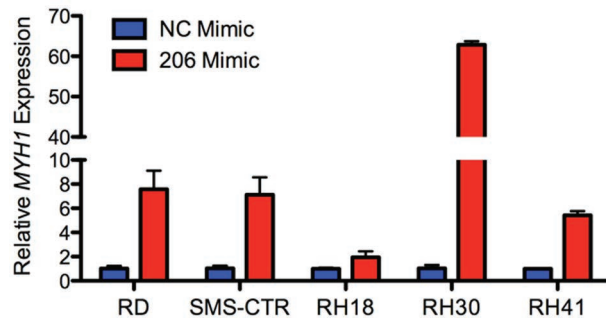**c**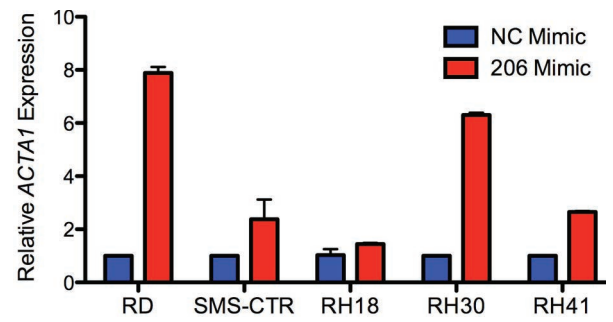**d**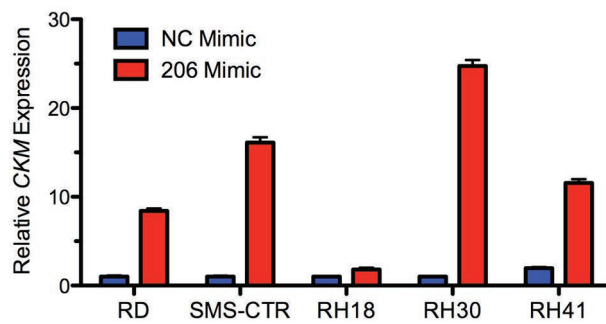

Supplementary Figure S1. Hanna et al.

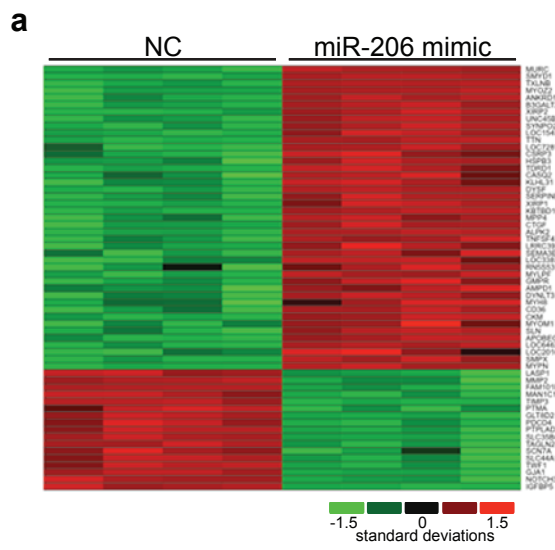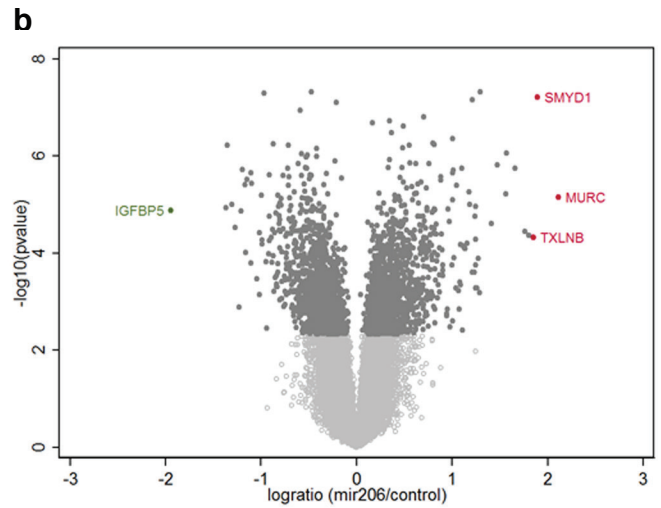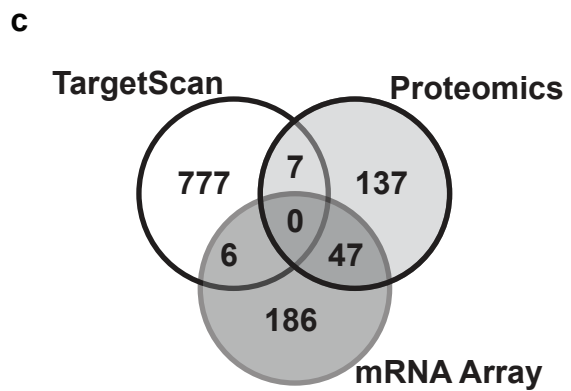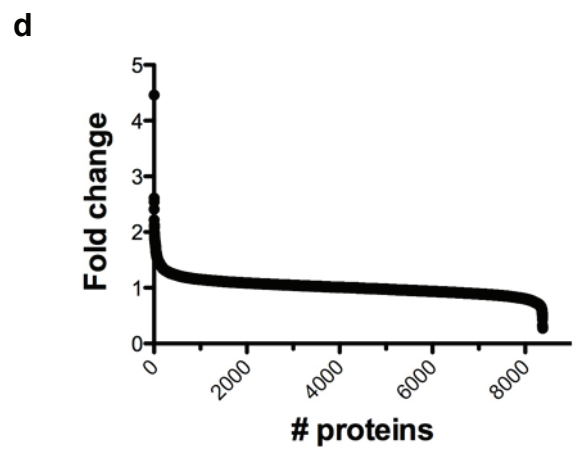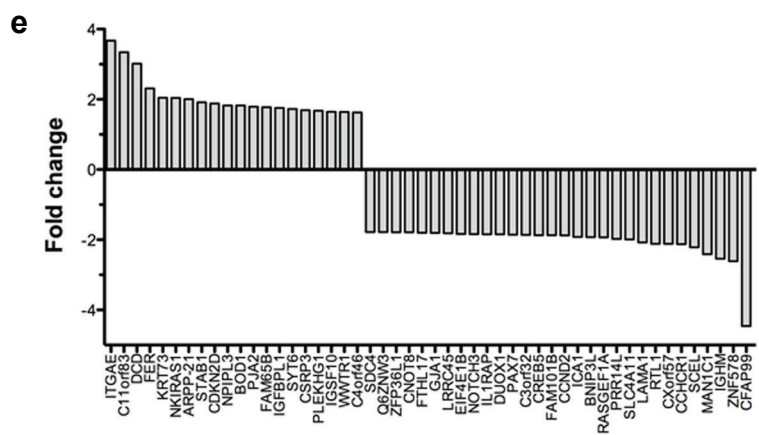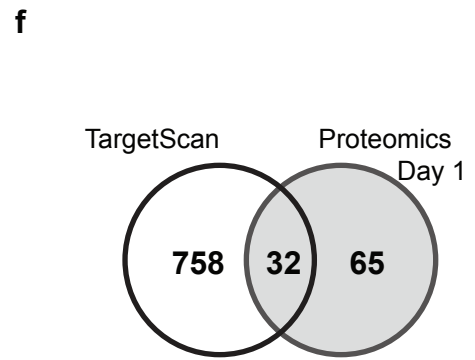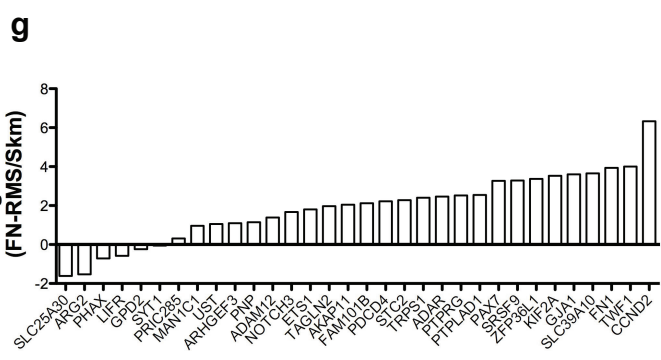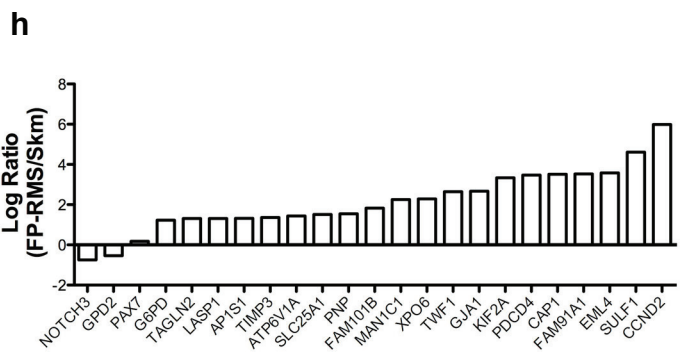

Supplementary Figure S2. Hanna et al.

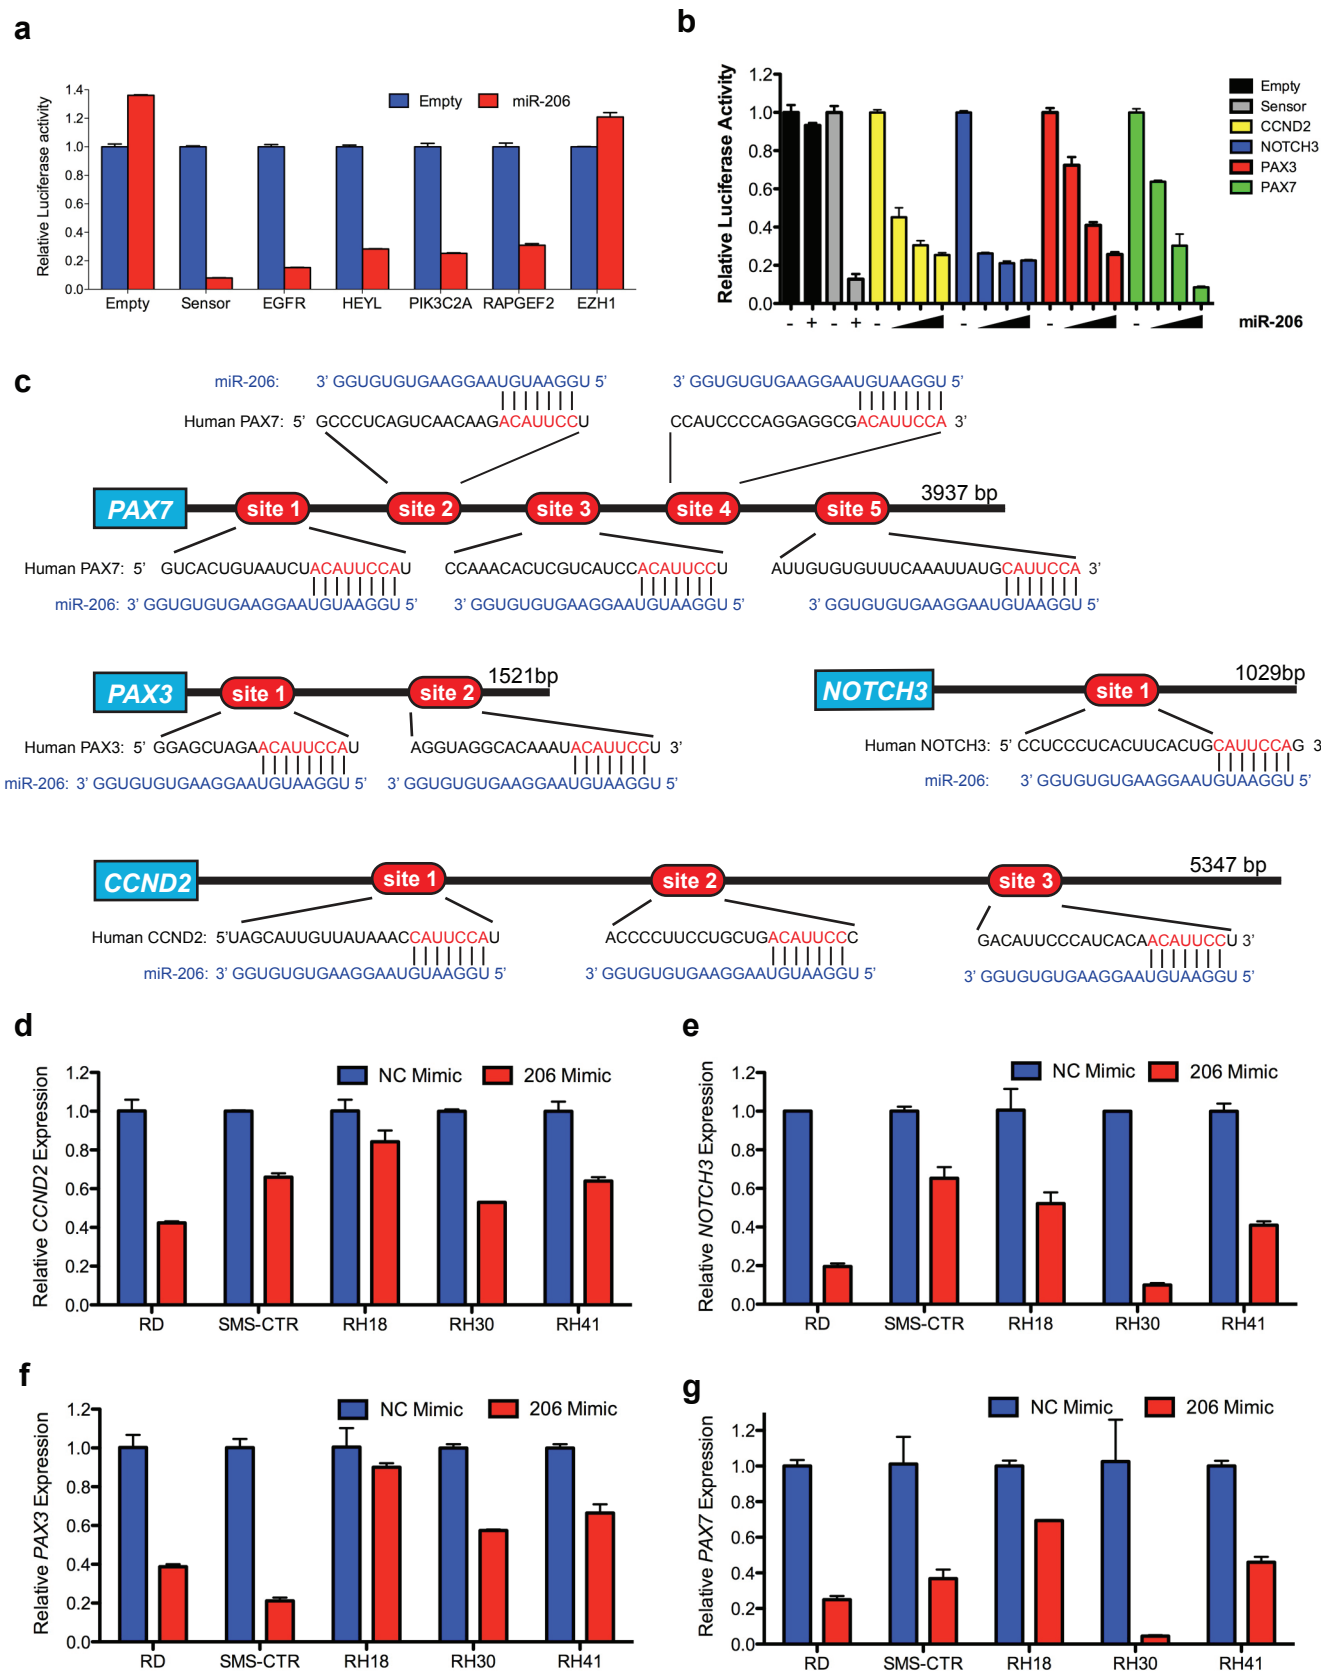

Supplementary Figure S3. Hanna et al.

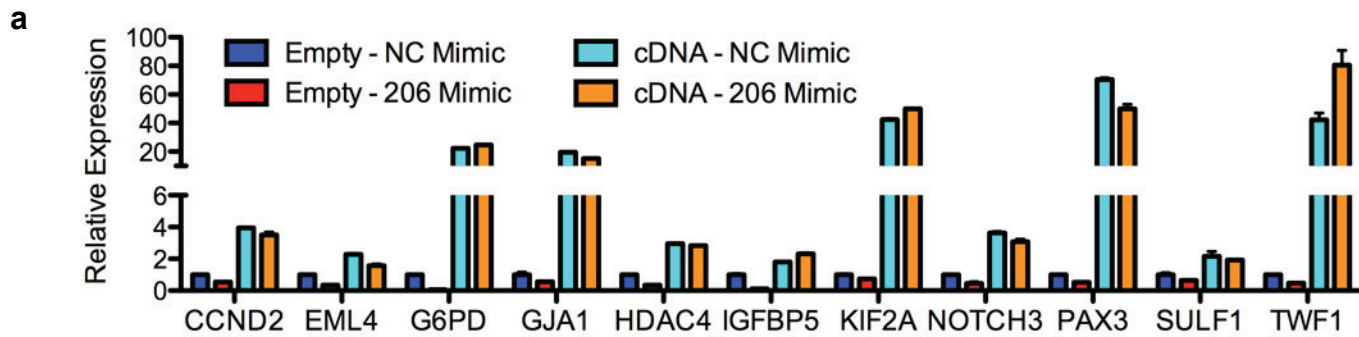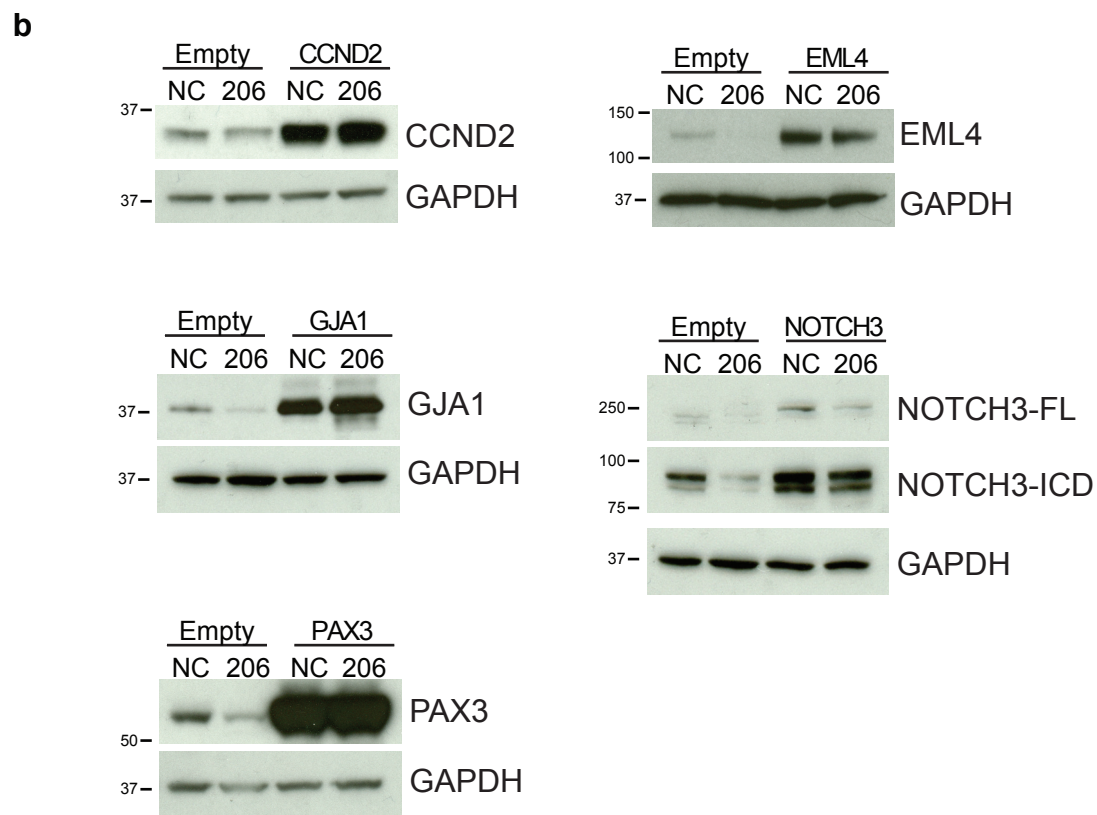

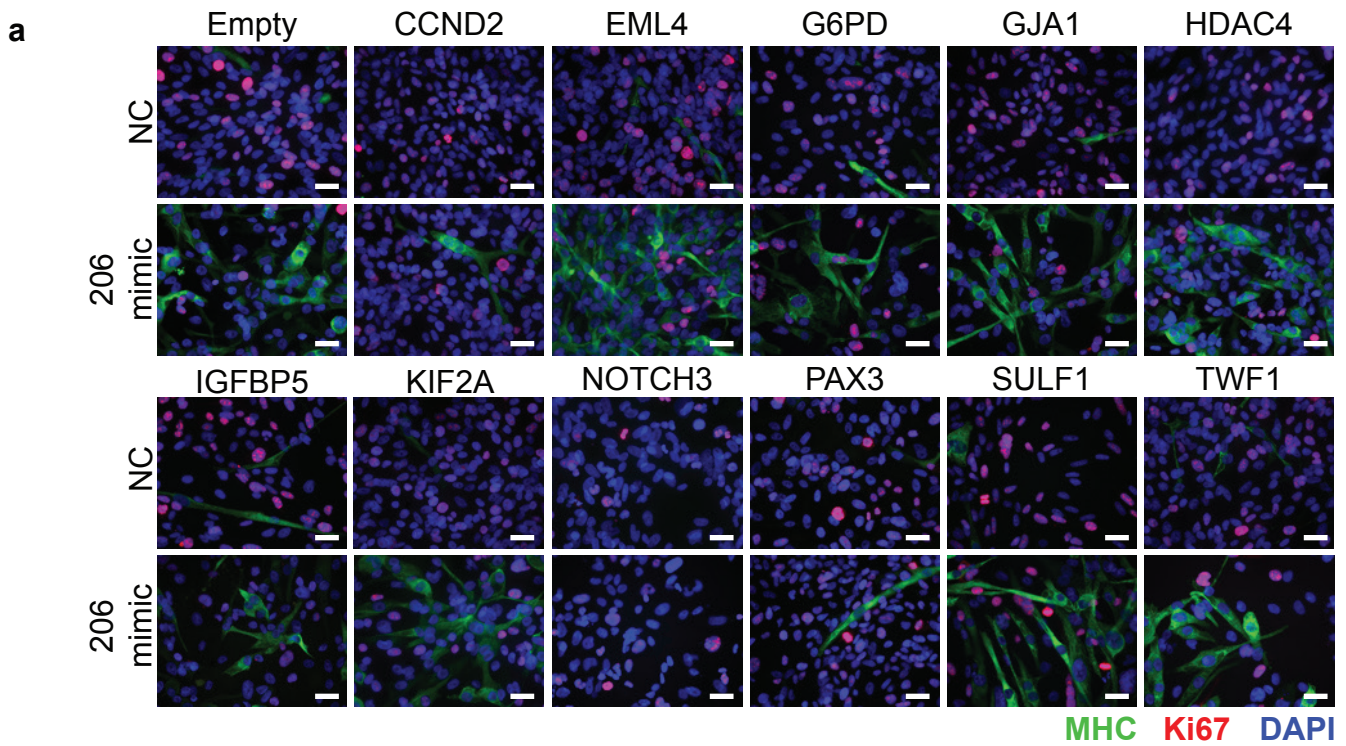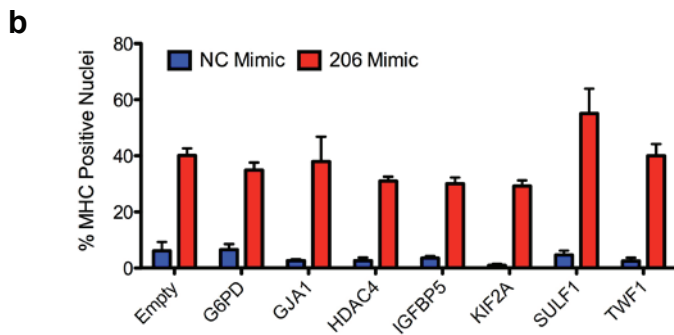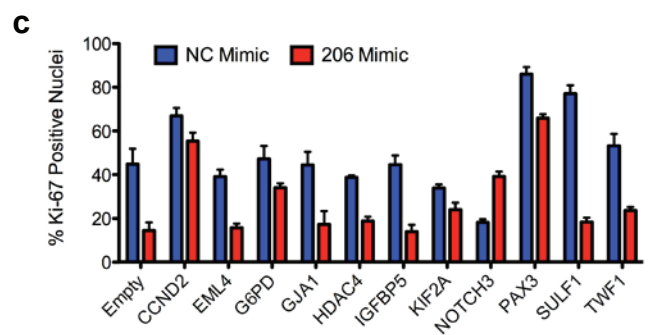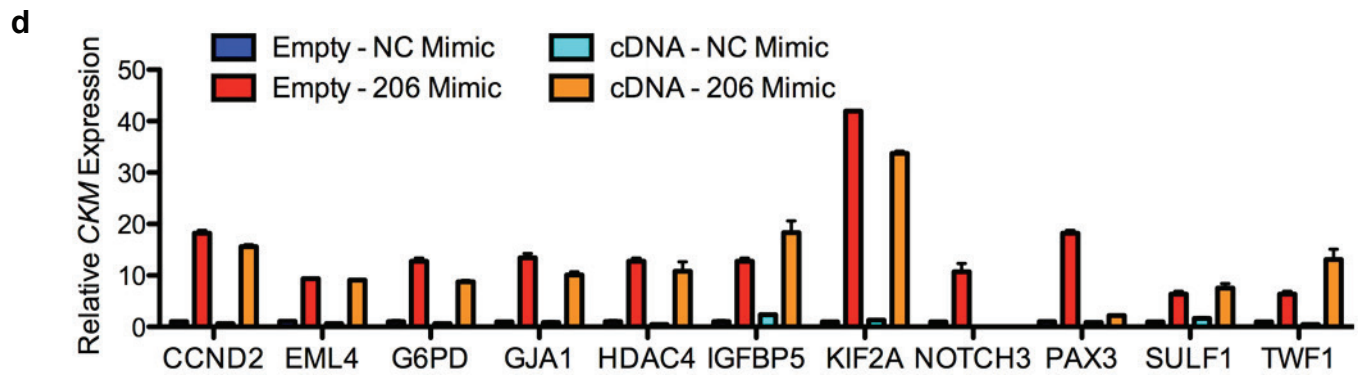



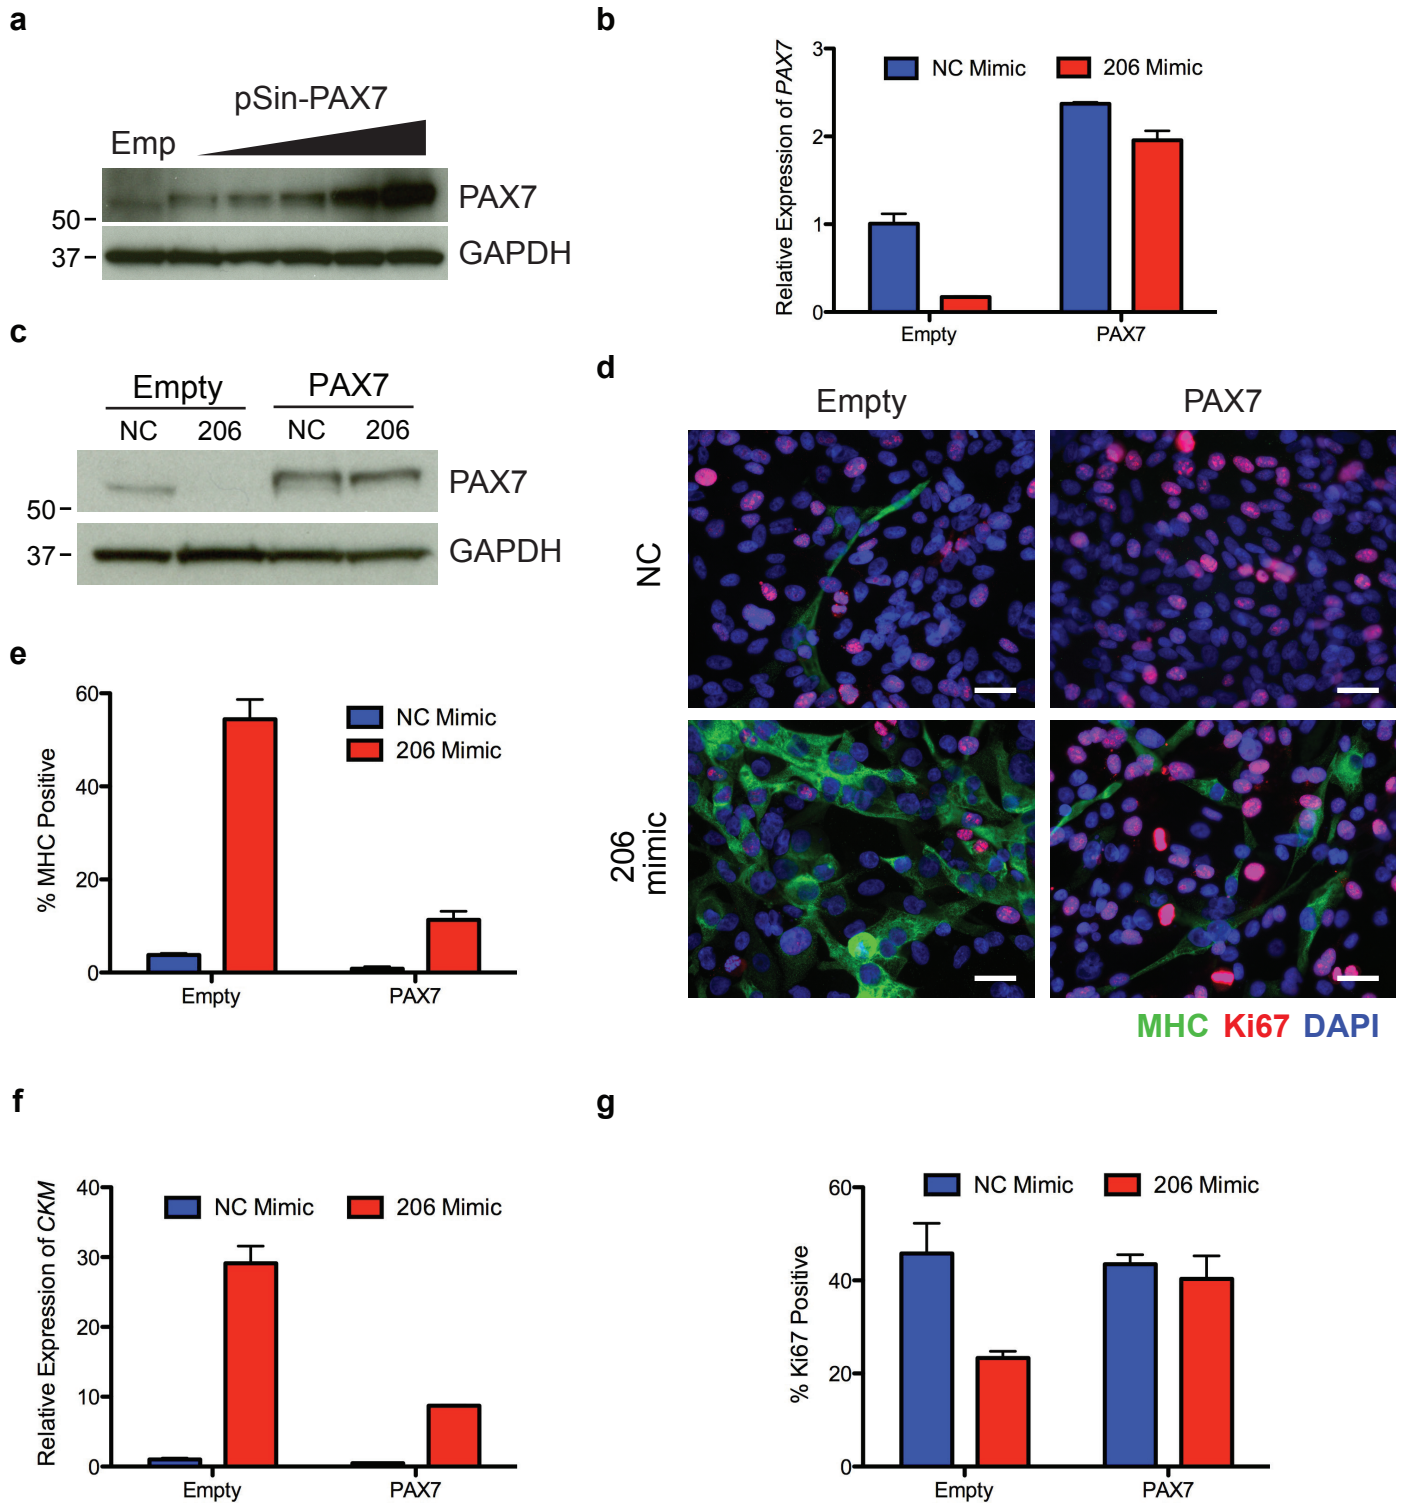

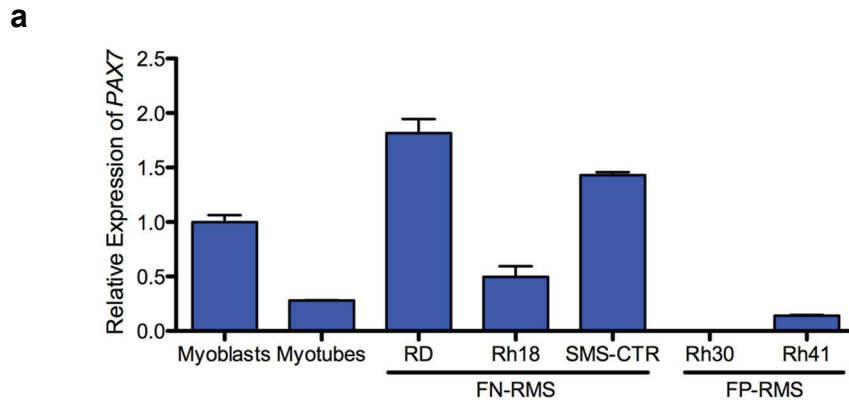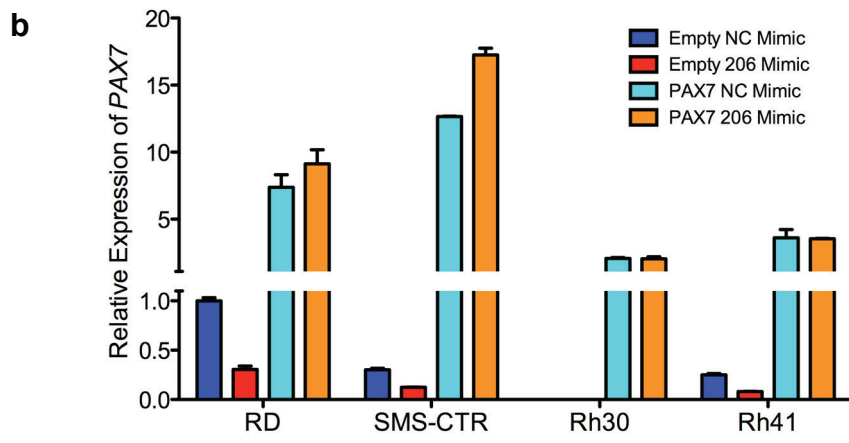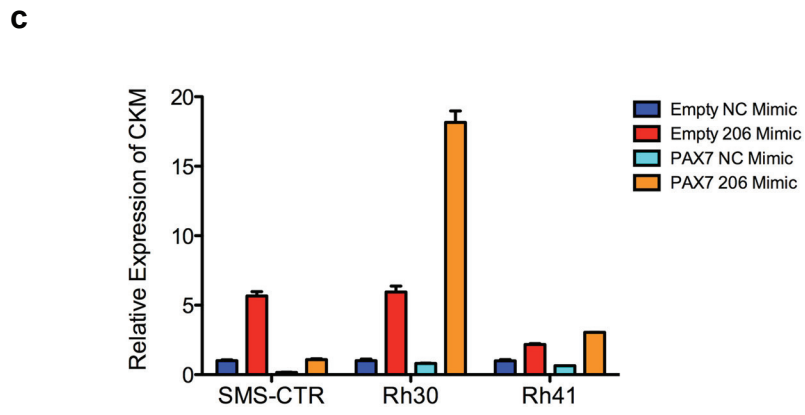

Supplementary Figure S7. Hanna et al.

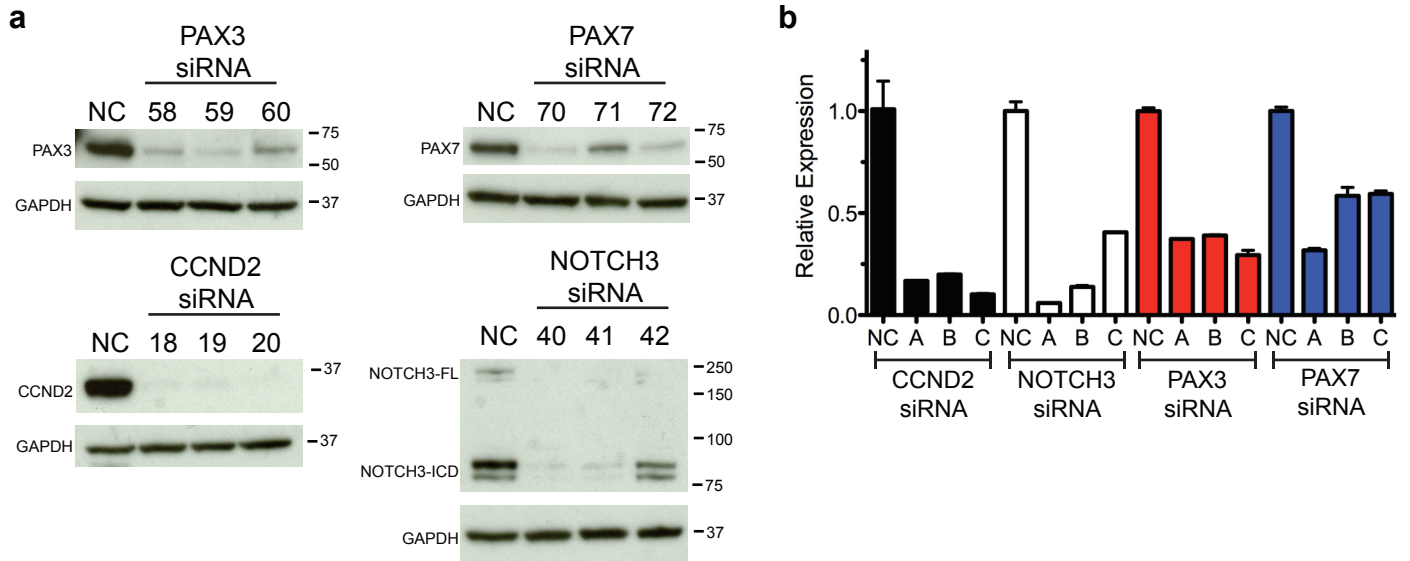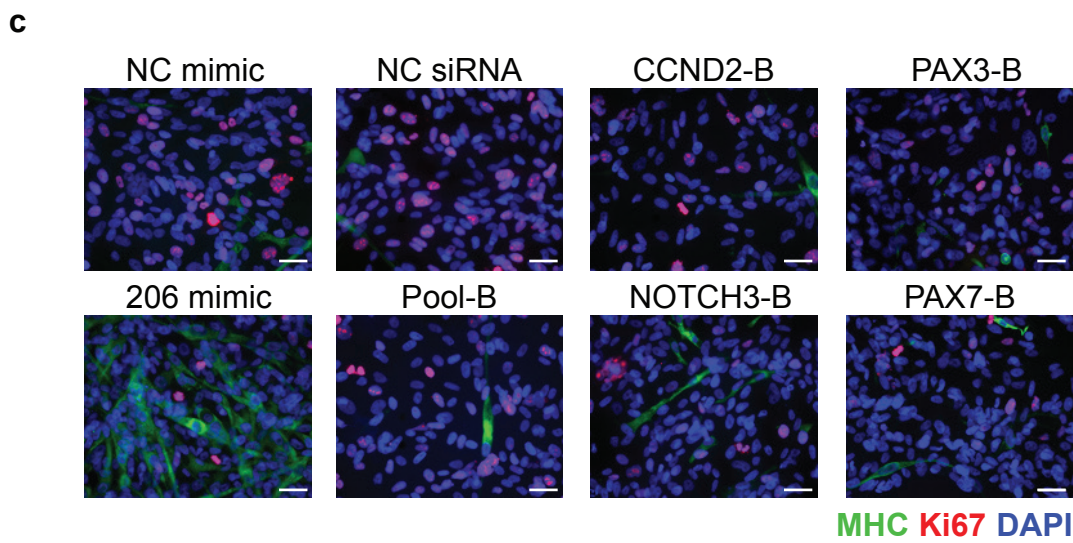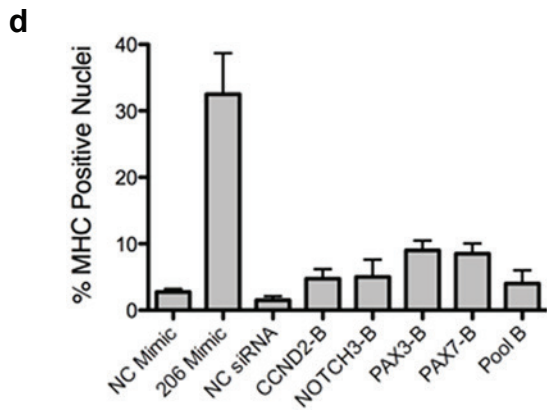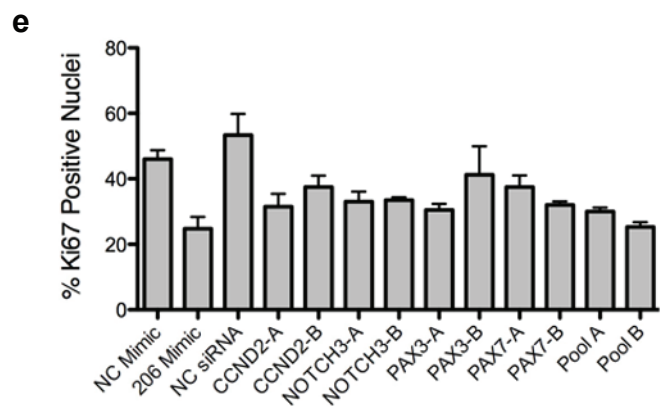

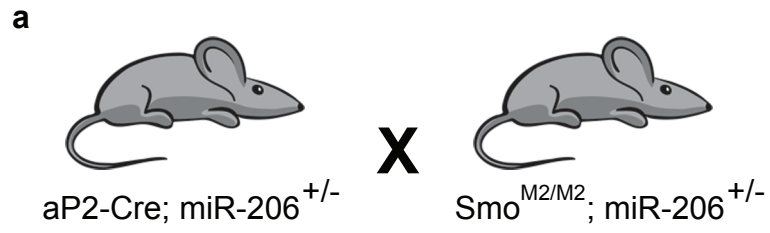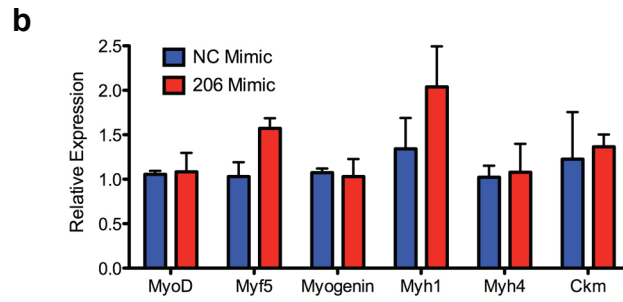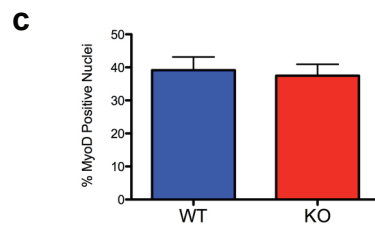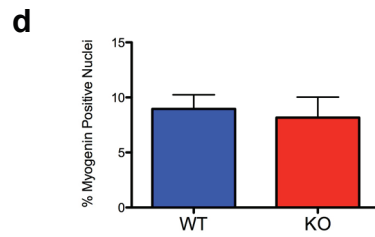

Supplement: cddis2016159x1.pdf [file cddis2016159x1.pdf]
